# Supplementary material for: Local genic base composition impacts protein production and cellular fitness
Source: PubMed Central journal article supplement (PMC5774297; doi:10.7717/peerj.4286), 2018-01-16
Supplement: peerj-06-4286-s003.pdf [file peerj-06-4286-s003.pdf]

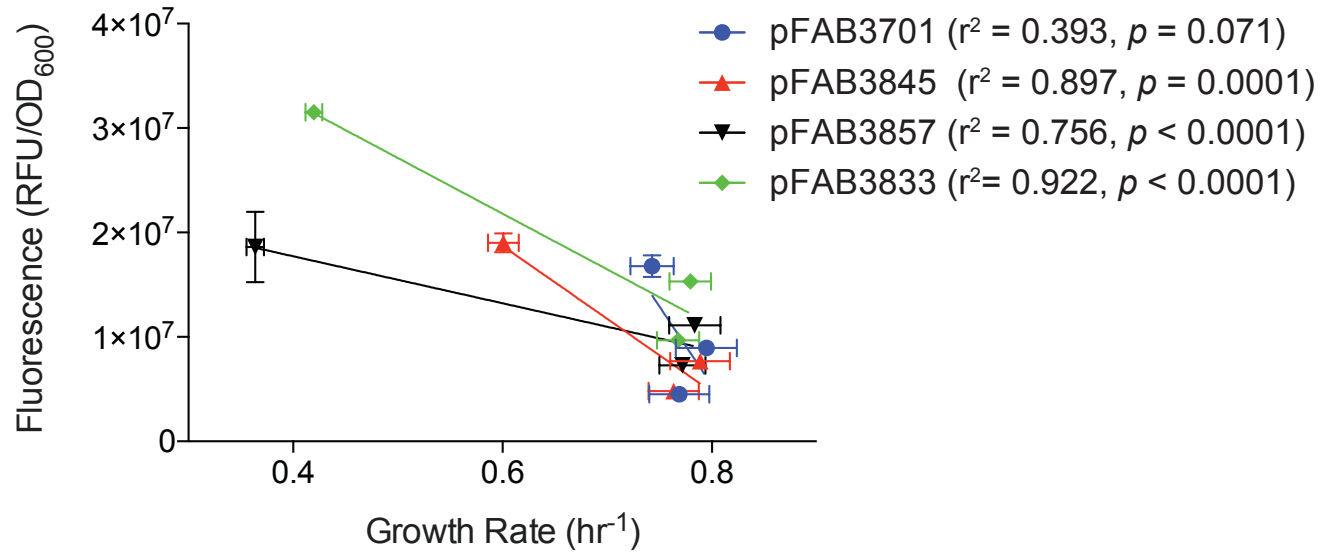

**Figure S1:** Association between GFP expression levels and growth rates of strains included in Figure 1. GFP genes were recoded at synonymous sites to have consistently low (41%), medium (50%) or high (59%) G+C content over the entire gene. Recoded GFP genes were expressed in pFAB vectors containing promoters of varying strength. Expression levels determined by intensity of cell fluorescence. Bars represent the mean  $\pm$  standard deviation of three biological replicates.
