# Supplementary material for: Local genic base composition impacts protein production and cellular fitness
Source: PubMed Central journal article supplement (PMC5774297; doi:10.7717/peerj.4286), 2018-01-16
Supplement: peerj-06-4286-s004.pdf [file peerj-06-4286-s004.pdf]

**Figure S2**

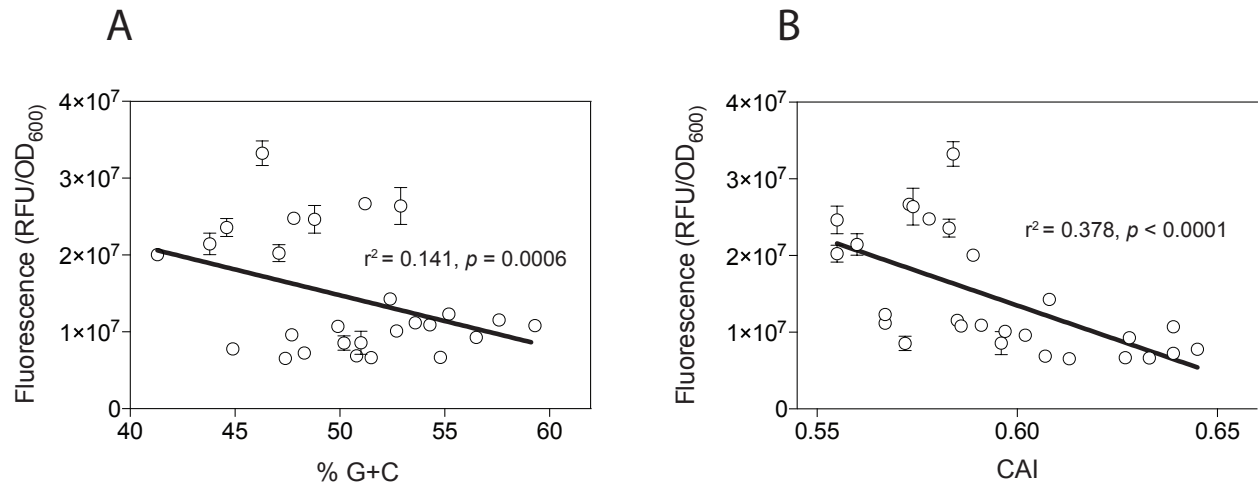

**Figure S2:** Association between GFP expression levels (as measured by cell fluorescence) and overall GC-content (A) or overall CAI (B) for the mosaic GFP genes. Points represent the mean  $\pm$  standard deviation of three biological replicates.
