# Supplementary material for: Local genic base composition impacts protein production and cellular fitness
Source: PubMed Central journal article supplement (PMC5774297; doi:10.7717/peerj.4286), 2018-01-16
Supplement: peerj-06-4286-s005.pdf [file peerj-06-4286-s005.pdf]

**Figure S3**

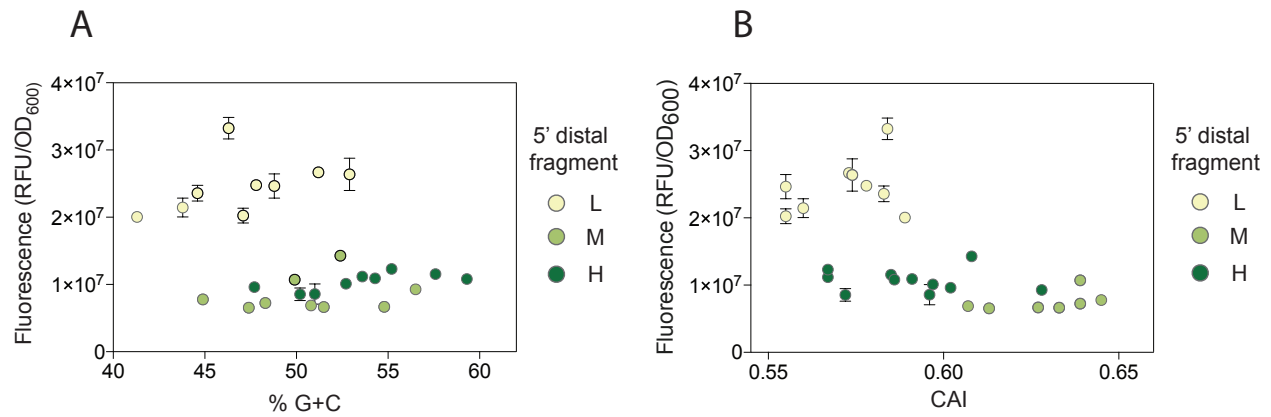

**Figure S3:** Association between GFP expression levels (as measured by cell fluorescence) and overall GC-content (A) or overall CAI (B) for the mosaic GFP genes. Points are colored according to the GC-content of the 5'-distal fragment as follows: yellow; 43% G+C; light green; 53% G+C; dark green; 61% G+C. Points represent the mean  $\pm$  standard deviation of three biological replicates.
