# Supplementary material for: Local genic base composition impacts protein production and cellular fitness
Source: PubMed Central journal article supplement (PMC5774297; doi:10.7717/peerj.4286), 2018-01-16
Supplement: peerj-06-4286-s006.pdf [file peerj-06-4286-s006.pdf]

**Figure S4**

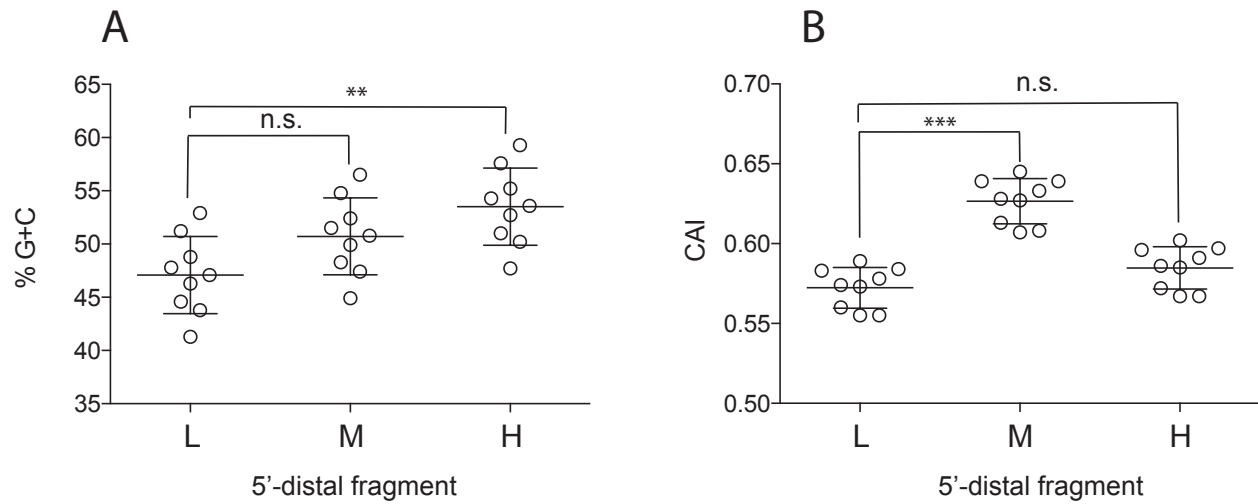

**Figure S4:** Comparison of overall genic GC-content (**A**) and overall genic CAI (**B**) with the GC-content of the 5'-distal fragment (L, 43% G+C; M, 53% G+C; H, 61% G+C) of the mosaic GFP genes. \*\* $p < 0.001$ , \*\*\* $p < 0.0001$  (Mann–Whitney–Wilcoxon test).
