# Supplementary material for: Local genic base composition impacts protein production and cellular fitness
Source: PubMed Central journal article supplement (PMC5774297; doi:10.7717/peerj.4286), 2018-01-16
Supplement: peerj-06-4286-s007.pdf [file peerj-06-4286-s007.pdf]

**Figure S5**

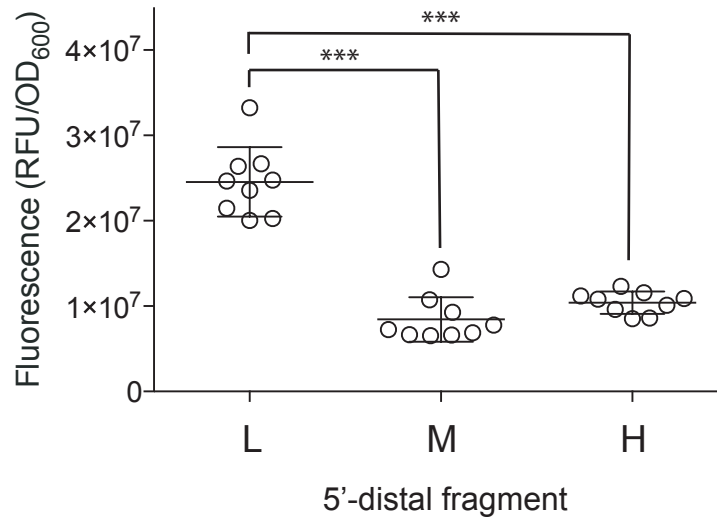

**Figure S5:** Mosaic GFP genes containing the 5'-distal L fragment express at higher levels than compositional mosaics containing M or H 5'-distal fragments. Expression levels determined by intensity of cell fluorescence. GC-contents of the 5'-distal fragment are as follows: L, 43% G+C; M, 53% G+C; H, 61% G+C). \*\*\* $p < 0.0001$  (Mann–Whitney–Wilcoxon test).
