# Supplementary material for: Local genic base composition impacts protein production and cellular fitness
Source: PubMed Central journal article supplement (PMC5774297; doi:10.7717/peerj.4286), 2018-01-16
Supplement: peerj-06-4286-s008.pdf [file peerj-06-4286-s008.pdf]

**Figure S6**

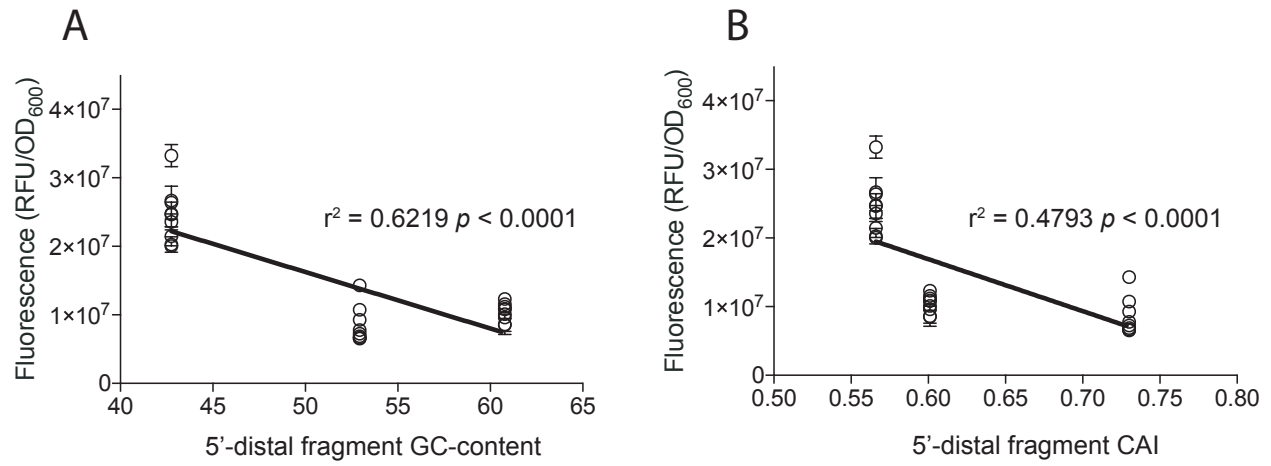

**Figure S6:** Association between GFP expression levels (as measured by cell fluorescence) and the GC-content (A) or CAI (B) of the 5'-distal fragment of mosaic GFP genes.
